# Supplementary material
Source: PubMed Central journal article supplement (PMC7006234)

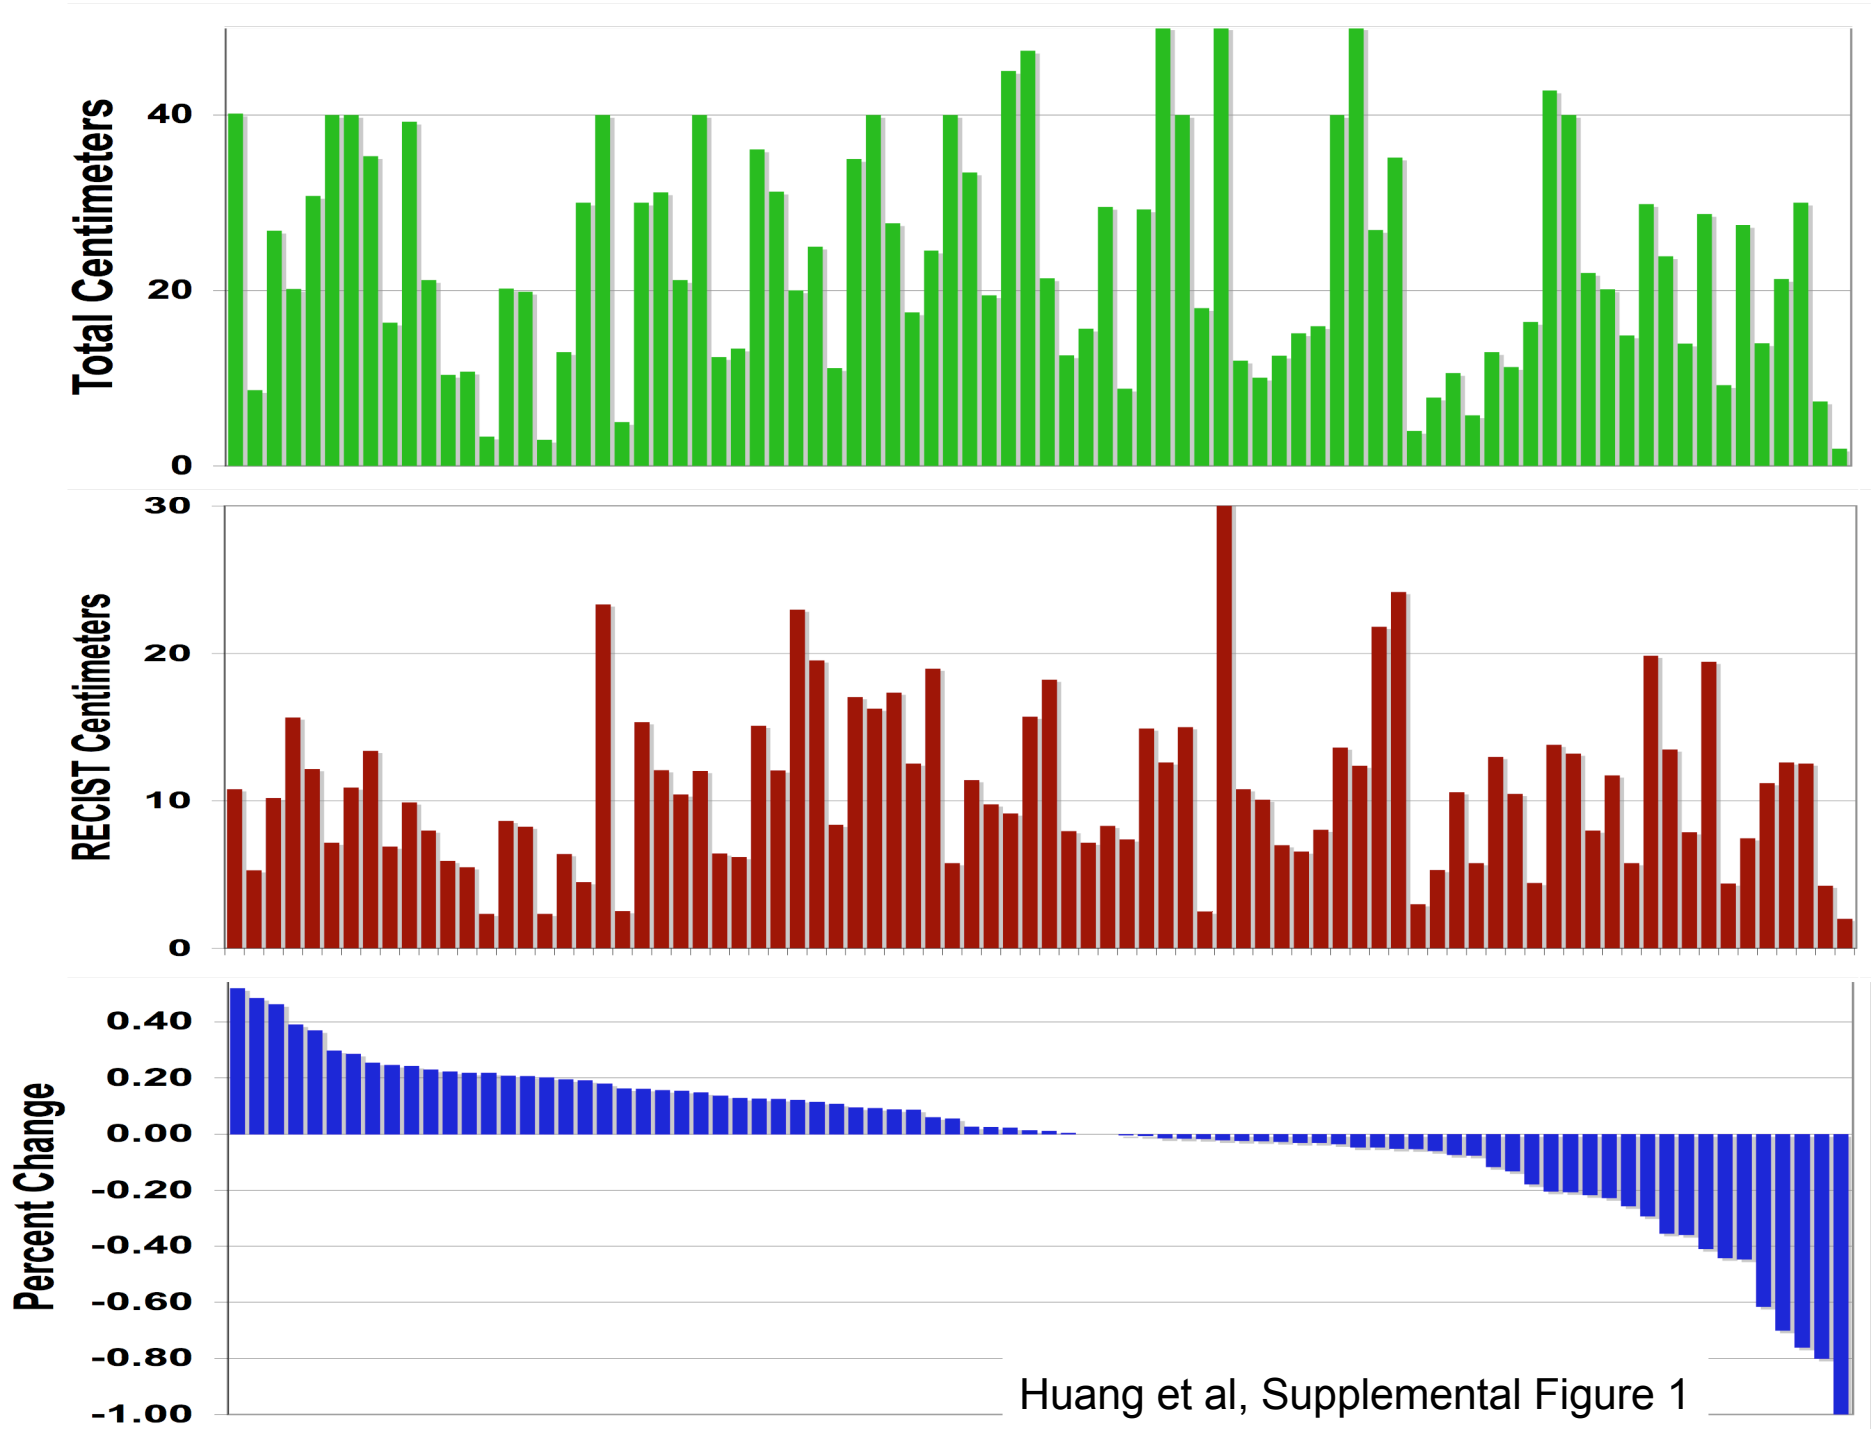

Huang et al, Supplemental Figure 1

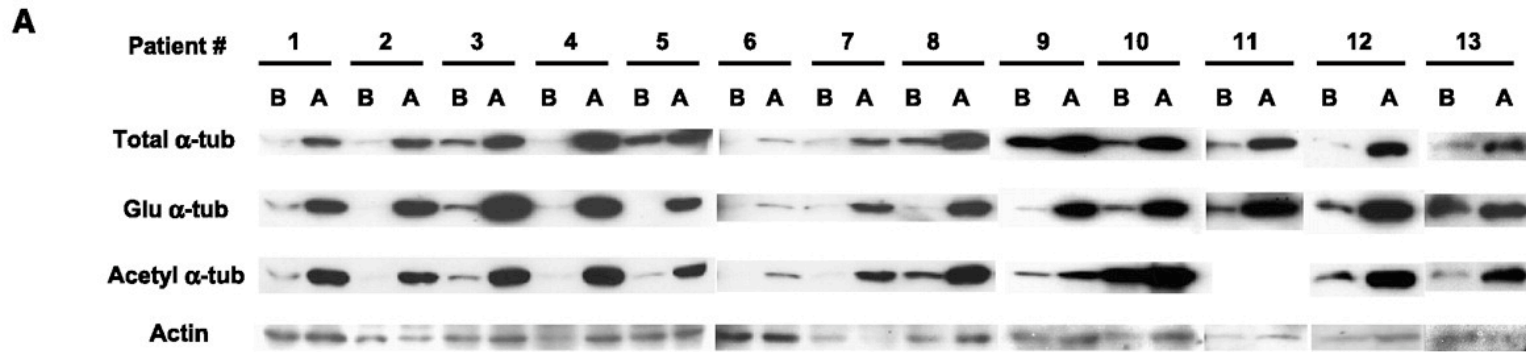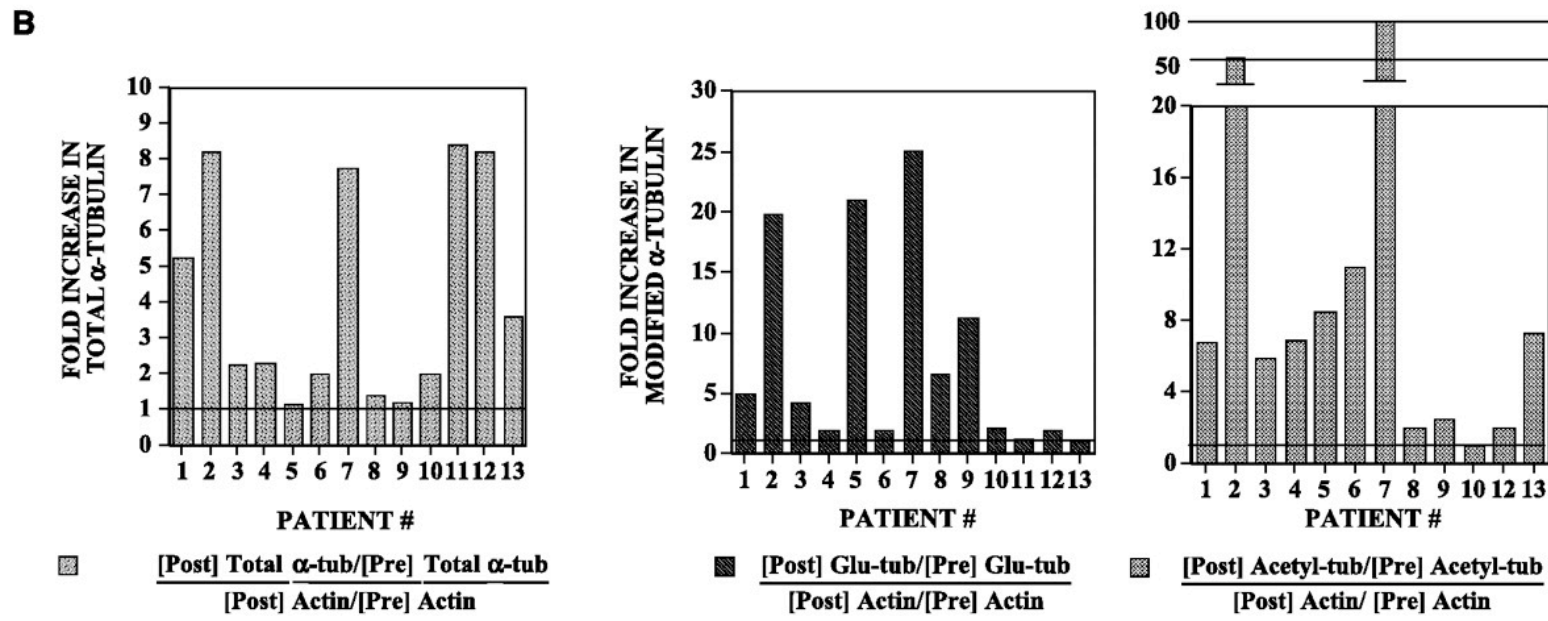

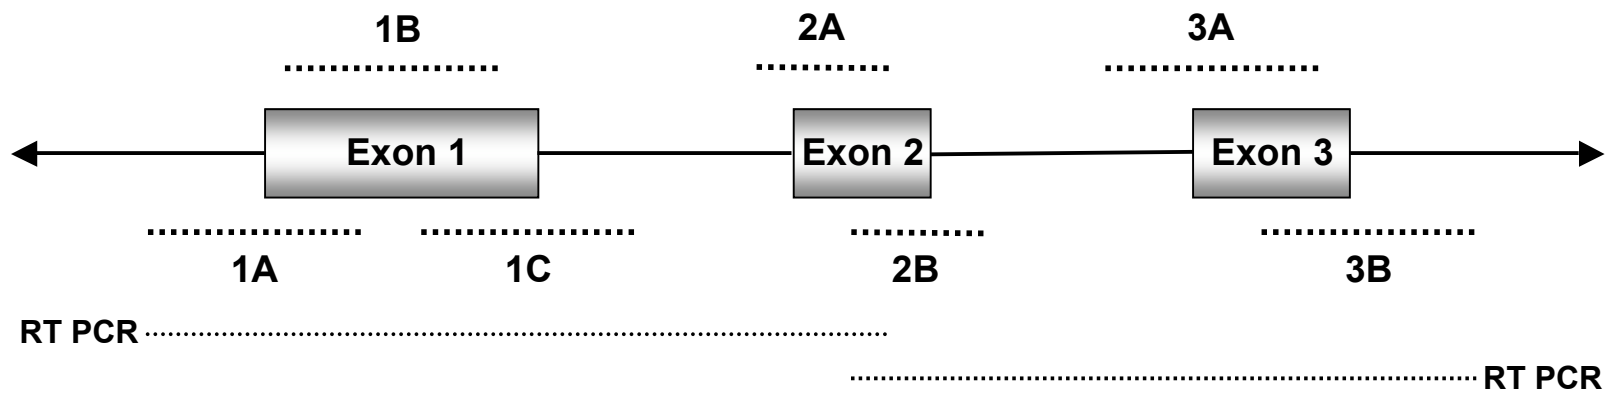

Supplement: NIHMS168511-supplement-2.pdf [file NIHMS168511-supplement-2.pdf]
